# Supplementary material for: Red Fluorescent Genetically Encoded Voltage Indicators with Millisecond Responsiveness
Source: PubMed Central journal article supplement (PMC6651345; doi:10.3390/s19132982), 2019-07-06
Supplement: sensors-19-02982-s001.pdf [file sensors-19-02982-s001.pdf]

Supplementary materials for:

## Red fluorescent genetically encoded voltage indicators with millisecond responsiveness

Liubov A. Kost, Violetta O. Ivanova, Pavel M. Balaban, Konstantin A. Lukyanov, Evgeny S. Nikitin, Alexey M. Bogdanov

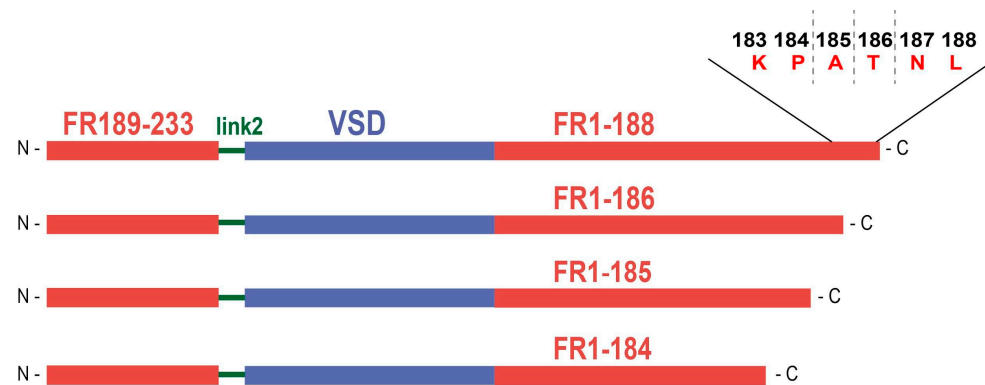

**Supplementary Figure S1.** VSD2 modifications - VSD2-186, VSD2-185, VSD2-184 - engineered by the cpFusionRed 1-188 C-terminus shortening. Red color shows two fragments of cpFusionRed, green represents interdomain linker part, voltage-sensing domain is shown in blue.

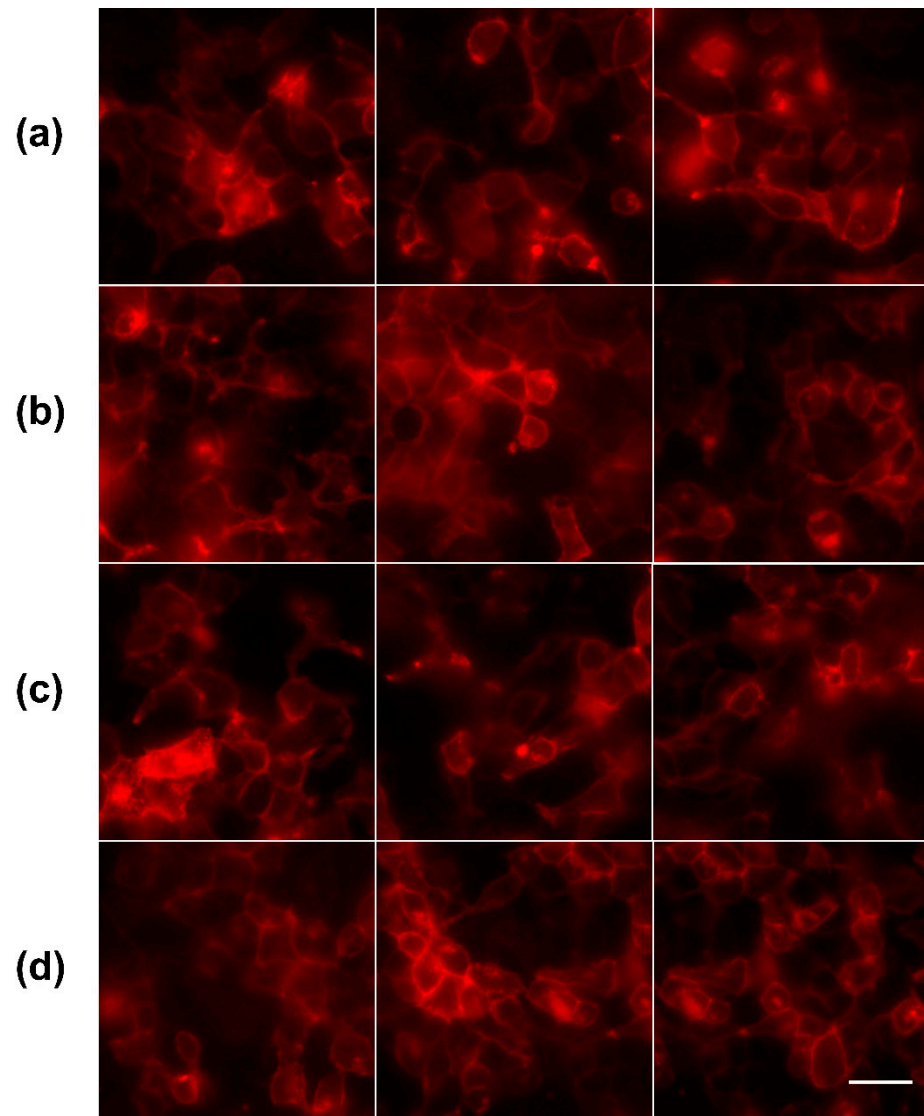

**Supplementary Figure S2.** Wide-field fluorescence images of live HEK293T cells expressing VSD-FR189-188-derived voltage indicators (a) VSD2, (b) VSD2-186, (c) VSD2-185, (d) VSD2-186. All the images were acquired 48 hours post transfection using BioRevo BZ-9000 (Keyence) epifluorescence microscope (Nikon CFI Plan APO VC 60x/ 1.40 Oil  $\infty$ /0.17 Dic N2 WD 0.13 Microscope Objective, RFP filter set TxRed. EX 560/40; DM 595; BA 630/60). Scale bar: 50  $\mu$ m.

**Supplementary Table S1.** Voltage probes response amplitudes analyzed by patch-clamp experiments in HEK293T cells. Signal amplitudes for each registered cell ( $\Delta F/F$ , %) are shown. “No fluorescence” - transfection of the probe revealed no visible fluorescence; “no response” - the probes did not respond to the voltage steps.

| Cell #         | VSD -1          | VSD 0           | VSD 2 | VSD 2-186 | VSD 2-185 | VSD 2-184 | VSD 3 | VSD 4 | VSD 5 | VSD 10      | VSD 17 | VSD 19 | VSD 21      | VSD 25 |
|----------------|-----------------|-----------------|-------|-----------|-----------|-----------|-------|-------|-------|-------------|--------|--------|-------------|--------|
| 1              | no fluorescence | no fluorescence | 0.91  | 1.25      | 0.71      | 0.35      | 0.36  | 0.3   | 1.49  | no response | -0.67  | -0.49  | no response | -2     |
| 2              |                 |                 | 1.37  | 1.10      | 0.36      | 0.48      | 0.4   | 0.55  | 0.41  |             | -0.44  | -0.91  |             | -2.13  |
| 3              |                 |                 | 1.53  | 0.57      | 0.55      | 0.32      | 1     | 0.71  | 0.54  |             | -0.63  | -0.61  |             | -1.13  |
| 4              |                 |                 | 1.19  | 1.32      | 0.39      | 0.7       | 0.99  | 0.8   | 0.65  |             | -3.09  |        |             |        |
| 5              |                 |                 | 1.28  | 1.65      | -2.17     |           |       |       |       |             |        |        |             |        |
| <b>Average</b> |                 |                 | 1.25  | 1.17      | 0.50      | 0.46      | 0.68  | 0.59  | 0.95  |             | -0.58  | -0.67  |             | -2.10  |
| <b>S.E.M.</b>  |                 |                 | 0.06  | 0.12      | 0.01      | 0.02      | 0.08  | 0.02  | 0.23  |             | 0.01   | 0.03   |             | 0.38   |

$\Delta F/F$ , %

**Supplementary Table S2.** Voltage probes responsiveness analyzed by patch-clamp experiments in HEK293T cells. Tau on and tau off values for each registered cell (ms) are shown.

| Cell #         | VSD 2 |      | VSD 2-186 |      | VSD 2-185 |      | VSD 2-184 |      | VSD 3 |      | VSD 4 |      | VSD 5 |      | VSD 17 |       | VSD 19 |      | VSD 25 |       |
|----------------|-------|------|-----------|------|-----------|------|-----------|------|-------|------|-------|------|-------|------|--------|-------|--------|------|--------|-------|
|                | ON    | OFF  | ON        | OFF  | ON        | OFF  | ON        | OFF  | ON    | OFF  | ON    | OFF  | ON    | OFF  | ON     | OFF   | ON     | OFF  | ON     | OFF   |
| 1              | 1.62  | 6.14 | 1.06      | 1.12 | 1.02      | 4.96 | 1.11      | 1.46 | 1.15  | 2.33 | 0.93  | 1.47 | 0.67  | 2.69 | 29.70  | 76.12 | 13.40  | 4.90 | 18     | 68.26 |
| 2              | 1.38  | 4.62 | 1.82      | 4.20 | 0.79      | 1.72 | 2.11      | 4.33 | 1.03  | 3.32 | 1.38  | 1.32 | 0.90  | 2.58 | 38.00  | 51.79 | 8.80   | 8.25 | 26     | 39.87 |
| 3              | 1.57  | 2.45 | 1.42      | 1.30 | 0.71      | 1.30 | 0.74      | 2.70 | 0.56  | 3.68 | 0.96  | 1.15 | 0.99  | 1.94 | 48.40  | 48.36 | 2.70   | 5.51 | 20     | 34.13 |
| 4              | 2.45  | 2.48 | 1.08      | 2.10 | 0.80      | 2.61 | 1.94      | 2.21 | 0.49  | 5.28 | 0.63  | 1.37 | 1.45  | 4.94 |        |       |        |      | 32     | 57.30 |
| 5              | 2.30  | 1.08 | 1.44      | 4.46 |           |      |           |      |       |      |       |      |       |      |        |       |        |      | 33     | 38.45 |
| <b>Average</b> | 1.86  | 3.35 | 1.36      | 2.64 | 0.83      | 2.65 | 1.48      | 2.68 | 0.81  | 3.65 | 0.98  | 1.33 | 1.00  | 3.04 | 38.70  | 58.76 | 8.30   | 6.22 | 25.80  | 47.60 |
| <b>S.E.M.</b>  | 0.21  | 0.90 | 0.14      | 0.71 | 0.06      | 0.82 | 0.33      | 0.61 | 0.17  | 0.61 | 0.15  | 0.07 | 0.16  | 0.66 | 5.41   | 8.74  | 3.10   | 1.03 | 3.04   | 6.50  |

Tau, ms

**Supplementary Table S3.** List of oligonucleotides used for engineering constructs with linkers 10, 17, 19 and 21 in this study. Pairs of sense and antisense oligonucleotides were melted and annealed to obtain double-stranded DNA fragments with the single-strand overhangs ready for ligation.

| Name                             | Oligonucleotide sequence                                  |
|----------------------------------|-----------------------------------------------------------|
| 10 KpnI GlySer5 BamHI sense      | CGGCAGCGGCAGCGGCG                                         |
| 10 KpnI GlySer5 BamHI antisense  | GATCCGCCGCTGCCGCTGCCGGTAC                                 |
| 15 KpnI GlySer10 BamHI sense     | CGGCAGCGGCAGCGGCAGCGGCAGCGGCAGCG                          |
| 15 KpnI GlySer10 BamHI antisense | GATCCGCTGCCGCTGCCGCTGCCGCTGCCGCTGCCGGTAC                  |
| 20 KpnI GlySer15 BamHI sense     | CGGCAGCGGCAGCGGCAGCGGCAGCGGCAGCGGCAGCGGCAGCGGCG           |
| 20 KpnI GlySer15 BamHI antisense | GATCCGCCGCTGCCGCTGCCGCTGCCGCTGCCGCTGCCGCTGCCGCTGCCGGTAC   |
| Olig19 Sense                     | CGGTCTGGCAGTGGATCGGGTTCGGGCTCAGGGTCTGGTTCAG               |
| Olig19 Antisense                 | GTACCGTTCTGGCAGTGGATCGGGTTCGGGCTCAGGGTCTGGTTCAGGATC       |
| Olig21 Sense                     | CGGCAGCGGTCTGGCAGTGGATCGGGTTCGGGCTCAGGGTCTGGTTCAG         |
| Olig21 Antisense                 | GTACCGGCAGCGGTCTGGCAGTGGATCGGGTTCGGGCTCAGGGTCTGGTTCAGGATC |

**Supplementary Table S4.** PCR primers used for engineering VSD2, 3, 4, 0 and -1 variants.

| <b>Name</b>        | <b>Oligonucleotide primers sequence</b>  |
|--------------------|------------------------------------------|
| FR189 Nhe for      | AAAAGCTAGCCGCCACCATGAAGATGCCCGG          |
| VSD Spe rev        | AAAAACTAGTCTGTGATATTGTTCTTCTGCT          |
| VSD overlap for    | ATGGAGATACCTACTACTGGTG                   |
| FR232 overlap rev  | CACCAGTAGTAGGTATCTCCATACCTCCATCACCAGCGC  |
| FR233 overlap rev  | GCGCTGGTGATGGAGGTAATGGAGATACCTACTACTGGTG |
| Link 2 BamH rev    | GTGGCGCTGGTGATGGAGGTAAGGATCC             |
| Link 3 S BamH rev  | GCGCTGGTGATGGAGGTAAGUGGATCC              |
| Link 4 GS BamH rev | GCGCTGGTGATGGAGGTAAGGUAGUGGATCC          |
